# Supplementary material
Source: Elsevier journal article supplement (https://www.sciencedirect.com/science/article/pii/S0009739X15000159)
Supplement: mmc1 [file S0009739X15000159:mmc1.docx]

MATERIAL SUPLEMENTARIO.

TABLA 2. Categorías diagnósticas de la clasificación de Bethesda para la citología tiroidea19.

| Categoría | Características | Riesgo de malignidad | Recomendación clínica |
| --- | --- | --- | --- |
| 1 | Insatisfactoria | 1-4 % | Nueva PAAF ecoguiada |
| 2 | Benigna | 0-3 % | Seguimiento clínico |
| 3 | Atipia, lesión folicular indeterminada | 5-10 % | Nueva PAAF ecoguiada |
| 4 | Neoplasia o sospecha de neoplasia folicular | 20-30 % | Lobectomía |
| 5 | Sospecha de malignidad | 50-75 % | Tiroidectomía total o lobectomía |
| 6 | Citología maligna | 97-99 % | Tiroidectomía total |

Tabla 3. Modelo de estratificación de riesgo de ETV de Caprini45.

| 1 PUNTO | 2 PUNTOS | 3 PUNTOS | 5 PUNTOS |
| --- | --- | --- | --- |
| Edad 41-60 años | 61-74 años | > 75 años | Ictus (< 1 mes) |
| Cirugía menor | Cirugía artroscópica | Historia ETV | Artroplastia programada de cadera o rodilla |
| IMC > 25 Kg/m2 | Cirugía abierta mayor (> 45 minutos) | Historia familiar ETV | Fractura de pierna, cadera o pelvis |
| Tumefacción MMII | Cirugía laparoscópica (> 45 minutos) | Factor V Leiden | Daño espinal agudo (< 1 mes) |
| Varices | Cáncer | Gen de la protrombina 20210A |  |
| Embarazo o puerperio | Encamamiento (> 72 horas) | Anticoagulante lúpico |  |
| Historia de abortos espontáneos inexplicados o recurrentes | Escayola | Anticuerpos anticardiolipina |  |
| Anticonceptivos o terapia hormonal sustitutiva | Acceso venoso central | Aumento en niveles de homocisteína |  |
| Sepsis (< 1 mes) |  | Trombopenia inducida por heparina |  |
| Enfermedad pulmonar grave, incluida neumonía (< 1 mes) |  | Otras trombofilias hereditarias o adquiridas |  |
| Función pulmonar disminuida |  |  |  |
| Infarto agudo de miocardio |  |  |  |
| Insuficiencia cardiaca congestiva (< 1 mes) |  |  |  |
| Enfermedad inflamatoria intestinal |  |  |  |
| Paciente inmovilizado por enfermedad médica |  |  |  |

MMII: miembros inferiores.

ETV: enfermedad tromboembólica venosa.

TABLA 4. Recomendaciones de terapia antitrombótica (a partir del American College of Chest Physicians Ed. 2012 y la escala de estratificación de riesgo de Caprini).

| Riesgo | Profilaxis farmacologica | Profilaxis mecánica |
| --- | --- | --- |
| Muy bajo | no | no |
| Bajo (Caprini 1-2) | no | MCG/CNI |
| Moderado (Caprini 3-4): | HBPM o HNF a dosis bajas | CNI |
| Moderado pero con elevado riesgo de sangrado |  | CNI |
| Alto (Caprini ≥ 5) | HBPM o HNF | CNI |
| Alto+riesgo alto hemorragia | Cuando se pueda | CNI |

MCG: Medias de compresión graduada. CNI: Compresión neumática intermitente. HBPM: heparina de bajo peso molecular. HNF: heparina no fraccionada.

TABLA 5. Contraindicaciones relativas para la tiroidectomía ambulatoria (American Thyroid Association)146.

| DEL PACIENTE | DEL ENTORNO | DE LA PATOLOGÍA |
| --- | --- | --- |
| Enfermedad cardiaca o respiratoria descompensada | Distancia excesiva del domicilio al centro hospitalario | Bocio de gran tamaño |
| Paciente con insuficiencia renal en diálisis | Paciente que vive solo sin personas que puedan acompañarle | Componente intratorácico extenso |
| Tratamiento anticoagulante o antiagregante | No posibilidad de transporte propio | Cáncer de tiroides localmente avanzado |
| Trastornos convulsivos | Preferencia del paciente | Hemostasia dificultosa |
| Trastorno ansioso | Barreras idiomáticas o de comunicación | Tiroidectomía difícil (tiroiditis de Hashimoto, enfermedad de Graves) |
| Apnea obstructiva del sueño. |  |  |
| Paciente con pérdida de audición o deterioro visual |  |  |
| Trastorno cognitivo |  |  |
| Embarazo |  |  |

TABLA 6. Indicadores de calidad.

|  | **Pacientes con consentimiento informado correctamente cumplimentado** |
| --- | --- |
| **Fórmula** | Pacientes intervenidos de tiroidectomía con consentimiento informado en la historia clínica y correctamente cumplimentado x 100 / Pacientes intervenidos de tiroidectomía. |
| **Exclusiones** | Ninguna |
| **Aclaraciones** | • El consentimiento deberá corresponder al procedimiento realizado.  • Pacientes ingresados para cirugía: Pacientes clasificados en GRDs de tiroidectomía y que han sido intervenidos.  Los datos mínimos que han de constar en los formularios del consentimiento incluyen:  · Identificación del centro.  · Identificación del paciente.  ·Identificación del representante legal, familiar o allegado que preste el consentimiento.  · Identificación del médico que informa.  · Identificación del procedimiento.  · Lugar y fecha.  · Firmas del médico y persona que presta el consentimiento.  · Apartado para la revocación del consentimiento. |
| **Tipo de indicador** | Proceso |
| **Justificación** | Según la Ley 41/2002 de Autonomía del Paciente, el Consentimiento Informado es la conformidad libre, voluntaria y consciente de un paciente, manifestada en el pleno uso de sus facultades después de recibir la información adecuada, para que tenga lugar una actuación que afecta a su salud.  El Documento de Consentimiento Informado (DCI) es el soporte documental de este proceso, y trata de garantizar que la información más relevante ha sido ofrecida por el médico y recibida por el paciente. Es una importante fuente de información, que complementa a la obtenida de forma oral, y que permite completar su proceso de toma de decisión. |
| **Origen del indicador** | Elaboración propia a partir de la legislación vigente |
| **Referencias bibliográficas** | • Ley 41/2002, de 14 de Noviembre, Básica reguladora de la Autonomía del Paciente y de Derechos y Obligaciones en materia de Información y Documentación Clínica. Boletín Oficial del Estado nº 274; 2002.157 |

|  | **Adecuación de la prescripción de profilaxis antibiótica** |
| --- | --- |
| **Fórmula** | Pacientes intervenidos de tiroidectomía con adecuada prescripción de profilaxis antibiótica x100/ Pacientes intervenidos de tiroidectomía |
| **Exclusiones** | • Pacientes con diagnóstico principal sugestivo de enfermedad infecciosa preoperatoria. |
| **Aclaraciones** | - No necesaria en general. - Indicado si hay factores de riesgo asociados: obesidad, inmunodepresión, cirugía prolongada, adición de vaciamiento ganglionar. - Se considera cumplimiento cuando existe una razón documentada de prescripción. |
| **Tipo de indicador** | Proceso |
| **Origen del indicador** | Adaptado de la Joint Commission |
| **Referencias bibliográficas** | . • Joint Commission Specifications Manual for National Hospital Inpatient Quality Measures Discharges 04-01-11 (2Q11) through 12-31-11 (4Q11) SCIP-Inf-1a-2h34.  . Scottish Intercollegiate Guidelines Network. “Antibiotic Prophylaxis in Surgery.A national clinical guideline.” July 200835.  . Johnson JT, Wagner RL. Infection following uncontaminated head and neck surgery.Arch Otolaryngol Head Neck Surg 1987; 113: 368-936.  . Simo R, French G. The use of prophylactic antibiotics in head and neck oncological surgery. Curr Opin Otolaryngol Head Neck Surg 2006; 14: 55-6137.  . Surgical Site Infection. Prevention and treatment of surgical site infection.Clinical guideline. National Collaborating Centre for women’s and children’s health. Comissioned by de National Institute for Health Clinical Excellence. October 200838.  . Seven H Sayin I, Turgut S. Antibiotic prophylaxis in clean neck disecctions. J LaryngolOtol 2004; 118: 213-639.  . Mangram AJ, Horan TC, Pearson ML, Silver LC, Jarvis WR.Guideline for Prevention of Surgical Site Infection, 1999. Hospital Infection Control Practices Advisory Committee. Am J Infect Control 1999; 27: 97-13240.  . Anderson DJ, Sexton DJ. Overview of control measures to prevent surgical site infection. Disponible: <http://www.uptodate.com/contents>. Descargado el 1 de Julio de 2013158. |

|  | **Pacientes con profilaxis antitrombótica correcta** |
| --- | --- |
| **Fórmula** | Pacientes intervenidos de tiroidectomía con profilaxis antitrombótica correcta x 100 / pacientes intervenidos de tiroidectomía. |
| **Exclusiones** | Ninguna |
| **Aclaraciones** | - Valoración del riesgo tromboembólico según escala de Caprini (Material Suplementario 1, Tabla 2). |
| **Tipo de indicador** | Proceso |
| **Justificación** | Los pacientes hospitalizados con alto riesgo de tromboembolismo venoso (TEV) pueden desarrollar una trombosis venosa profunda, y morir de tromboembolismo pulmonar antes incluso de que el diagnóstico sea sospechado. |
| **Origen del indicador** | Adaptado a partir del Institute Health Improvement (IHI) |
| **Referencias bibliográficas** | - Geerts WH, Bergqvist D, Pineo GF, Samama CM, Lassen MR, Colwell CW, American College of Chest Physicians. Prevention of venous thromboembolism. Chest 2008; 133:381S-453S43. - Caprini JA, Arcelus JI, Hasty JH, Tamhane AC, Fabregas F. Clinical assessment of venous thromboembolic risk in surgical patients. Semin Thromb Hemost 1991; 17 (suppl 3): 304-31245. - Antithrombotic therapy and prevention of thrombosis, 9th edition, American College of Chest Physicians Evidence- Based Clinical Practice Guideline46. - Lloyd NS, Douketis JD, Moinuddin I, Lim W, Crowther MA: Anticoagulant prophylaxis to prevent asymptomatic deep vein thrombosis in hospitalized medical patients: a systematic review and meta-analysis. J Thromb Haemost 2008; 6: 405-1447. - Roy M, Rajamanickam V, Chen H, Sippel R. Is DVT prophylaxis necessary for thyroidectomy and parathyroidectomy? Surgery 2010; 148: 1163-948. - Decousus H, Tapson VF. Factors at admission associated with bleeding risk in medical patients: findings from the IMPROVE Investigators. Chest 2011; 139: 69-7949. |

|  | **Administración de dexametasona como profilaxis antiemética** |
| --- | --- |
| **Fórmula** | Pacientes sometidos a tiroidectomía a los que se administra dexametasona en la inducción anestésica x100/ pacientes sometidos a tiroidectomía |
| **Exclusiones** | Pacientes que refieran o que se documente intolerancia o alergia a la dexametasona o a corticoides. |
| **Aclaraciones** | - Se recomienda el uso rutinario de profilaxis antiemética con una única dosis preoperatoria de 8 mgrs. de dexametasona. |
| **Tipo de indicador** | Proceso |
| **Justificación** | - La dexametasona, en una sola dosis preoperatoria, reduce la incidencia de NVPO, el dolor y la necesidad de analgésicos, y mejora la función vocal. - Las NVPO tienen una incidencia alta tras la tiroidectomía y provocan disconfort y falta de satisfacción en el paciente, y además el aumento de presión venosa local puede poner en peligro la hemostasia. |
| **Referencias bibliográficas** | - Sonner JM, Hynson JM, Clark O, Katz JA. Nausea and vomiting following thyroid and parathyroid surgery. J Clin Anesth 1997; 9: 398-40251. - Worni M, Schudel HH, Seufert E, Inglin R, Hagemann M, Vorburger SA, Candinas D. Randomized controlled trial on single dose steroid before thyroidectomy for benign disease to improve postoperative nausea, pain, and vocal function. Ann Surg 2008; 248: 1060-652. - Feroci F, Rettori M, Borrelli A, Lenzi E, Ottaviano A, Scatizzi M. Dexamethasone prophylaxis before thyroidectomy to reduce postoperative nausea, pain and vocal dysfunction: a randomized clinical controlled trial. Head Neck 2011; 33:840-653. - Chen CC, Siddiqui FJ, Chen TL, Chan ES, Tam KW. Dexamethasone for prevention of postoperative nausea and vomiting in patientes undergoing thyroidectomy: meta-analysis of randomized controlled trials. World J Surg 2012; 36: 61-854. - Lee Y, Lin PC, Lai HY, Huang SJ, Lin YS, Cheng CR. Prevention of PONV with dexamethasone in female patients undergoing desflurane anesthesia for thyroidectomy. Acta Anaesthesiol Sin 2001; 39: 151-655. |

|  | **Existencia del listado de verificación quirúrgica de la Organización Mundial de la Salud** |
| --- | --- |
| **Fórmula** | Pacientes intervenidos de tiroidectomía que tienen el listado de verificación quirúrgica en la historia clínica x 100 / pacientes sometidos a tiroidectomía. |
| **Exclusiones** | Ninguna |
| **Aclaraciones** | Listado de verificación de seguridad quirúrgica (check list) documentado: constancia de una hoja de verificación de seguridad quirúrgica en la historia clínica ó cualquier otro sistema de registro. |
| **Tipo de indicador** | Proceso |
| **Justificación** | Se deberían implantar el “Listado de Verificación de Seguridad  Quirúrgica” en cualquier procedimiento para mejorar  la seguridad de las intervenciones y disminuir las complicaciones  evitables. |
| **Origen del indicador** | Adaptado de Estrategia de seguridad del paciente del Ministerio  de Sanidad. 2010 |
| **Referencias bibliográficas** | • IHI Home Page [sede Web]. Cambridge: Institute for Healthcare Improvement; [acceso 29-07-11]. Surgical Check list [aproximadamente 3 pantallas]. Disponible en Guía NICE <http://app.ihi.org/imap/tool/>www.who.int/patientsafety/safesurgery/tools_resources/  sssl_checklist_spanish.pdf158  • Haynes AB, Weiser TG, Berry WR, Lipsitz SR, Breizat AH, Dellinger EP et al. The Safe Surgery Saves Lives Study Group. A surgical safety checklist to reduce morbidity and mortality in a global population. N Engl J Med 2009; 360:491-9160. |

|  | **Adecuación de estancia preoperatoria** |
| --- | --- |
| **Fórmula** | Pacientes intervenidos de tiroidectomía el mismo día o al día siguiente del ingreso x 100 / pacientes intervenidos de tiroidectomía |
| **Exclusiones** | Paciente ingresado por un motivo diferente de la intervención quirúrgica de la tiroidectomía. |
| **Aclaraciones** | • Incluye todos los pacientes clasificados en un GRD quirúrgico de tiroidectomía y cuyo tipo de ingreso fue programado.  • Se considera cumplimiento cuando la fecha de la intervención quirúrgica es la del mismo día ó el día siguiente al del ingreso. |
| **Tipo de indicador** | Proceso |
| **Justificación** | El AEP (Approppiateness Evaluation Protocol) considera adecuado que el paciente que requiere anestesia sea intervenido el mismo día del ingreso o el día siguiente. |
| **Origen del indicador** | Elaboración propia a partir de criterios del AEP. |
| **Referencias bibliográficas** | Gertman P.M., Restuccia J.D. The approppiateness evaluation protocol: a thecnique for assessing unnecesary days of hospital care. Med Care 1981; 19:855-71161. |

|  | **Cumplimiento de la estancia postoperatoria de un día** |
| --- | --- |
| **Fórmula** | Pacientes intervenidos de tiroidectomía que son dados de alta al día siguiente de la intervención x 100 / pacientes intervenidos de tiroidectomía. |
| **Exclusiones** | Pacientes con otra cirugía asociada de igual o superior complejidad que la tiroidectomía |
| **Aclaraciones** | • Incluye todos los pacientes clasificados en un GRD quirúrgico de tiroidectomía y cuyo tipo de ingreso fue programado.  • Se considera cumplimiento cuando la fecha del alta es la del día siguiente al de la intervención quirúrgica si el paciente no cumple ningún criterio de estancia según el AEP (vómitos, dolor no controlado, requerimiento de medicación intravenosa, requerimiento de monitorización, etc.) |
| **Tipo de indicador** | Proceso |
| **Justificación** | El AEP (Approppiateness Evaluation Protocol) considera inadecuada el ingreso de pacientes que no tienen ningún criterio de ingreso en hospital de agudos. |
| **Origen del indicador** | Elaboración propia a partir de criterios del AEP. |
| **Referencias bibliográficas** | Gertman P.M., Restuccia J.D. The approppiateness evaluation protocol: a thecnique for assessing unnecesary days of hospital care. Med Care 1981; 19:855-71161. |

|  | **Infección de sitio quirúrgico ISQ** |
| --- | --- |
| **Fórmula** | Pacientes sometidos a tiroidectomía que presentan ISQ, según criterios del Center for Diseases Control and Prevention norteamericano (CDC) x 100 / pacientes sometidos a tiroidectomía. |
| **Aclaraciones** | - Incluye los 30 primeros días del postoperatorio tras tiroidectomía. - Según las publicaciones, esta cifra no debe superar el 2%, aunque puede aumentar si se considera de forma aislada la tiroidectomía por cáncer. |
| **Tipo de indicador** | Resultado |
| **Justificación** | La incidencia de ISQ varía dependiendo de la localización y del tipo de cirugía. Si no existe inflamación previa de los tejidos, y se mantiene la integridad de la vía respiratoria y digestiva durante el procedimiento, la tiroidectomía debe considerarse cirugía limpia |
| **Origen del indicador** | Elaboración propia |
| **Referencias bibliográficas** | - Bratzler DW, Hunt DR. The surgical infection prevention and surgical care improvement projects: national initiatives to improve outcomes for patients having surgery. Clin Infect Dis 2006; 43:32232. - Culver DH Horan TC, Gaynes RP, Martone WJ, Jarvis WR, Emori TG, et al. Surgical wound infection rates by wound class, operative procedure, and patient risk index. National Nosocomial Infections Surveillance System. Am J Med 1991; 91 (3B): 1525-7533. |

|  | **Infección nosocomial diferente de la infección del sitio quirúrgico** |
| --- | --- |
| **Fórmula** | Pacientes sometidos a tiroidectomía que tienen infección nosocomial diferente a la de ISQ x 100 / pacientes sometidos a tiroidectomía |
| **Aclaraciones** | - Incluye los 30 primeros días del postoperatorio tras tiroidectomía. |
| **Tipo de indicador** | Resultado |
| **Origen del indicador** | Elaboración propia |
| **Referencias bibliográficas** | - Bratzler DW, Hunt DR. The surgical infection prevention and surgical care improvement projects: national initiatives to improve outcomes for patients having surgery. Clin Infect Dis 2006; 43:32232. |

|  | **Lesión recurrencial transitoria** |
| --- | --- |
| **Fórmula** | Pacientes sometidos a tiroidectomía que presentan lesión transitoria del nervio laríngeo recurrente x 100 / pacientes sometidos a tiroidectomía |
| **Aclaraciones** | Se considera caso de lesión recurrencial transitoria al paciente sometido a tiroidectomía con síntomas compatibles al que se confirma la lesión del nervio laríngeo recurrente mediante laringoscopia y se resuelve antes de un año tras la intervención. |
| **Tipo de indicador** | Resultado |
| **Justificación** | Las alteraciones de la fonación postoperatorias deberán ser evaluadas por el cirujano. La laringoscopia postoperatoria es recomendable para detectar disfunción postoperatoria de cuerdas vocales que pueda beneficiarse de medidas terapéuticas, y como necesario control de calidad. Resulta indispensable en pacientes con:   - Alteración de motilidad de cuerdas vocales preoperatoria. - Desarrollo postoperatorio de disfonía, fonoastenia, voz bitonal o trastorno deglutorio. - Si se ha efectuado neuromonitorización intraoperatoria, como control de calidad. |
| **Origen del indicador** | Elaboración propia |
| **Referencias bibliográficas** | - Musholt TJ, Clerici T, Dralle H, Frilling A, Goretzki PE, Hermann MM et al. The Interdisciplinary Task Force “Guidelines” of the German Association of Endocrine Surgeons. German Association of Endocrine Surgeons practice guidelines for the surgical treatment of benign thyroid disease. Langenbecks Arch Surg 2011; 396:639-499. - Hodin R, Clark O, Doherty G, Grant C, Heller K, Weige R. Voice issues and laryngoscopy in thyroid surgery patients. Surgery 2013; 154:46-7156. |

|  | **Lesión recurrencial permanente** |
| --- | --- |
| **Fórmula** | Pacientes sometidos a tiroidectomía que presentan lesión permanente del nervio laríngeo recurrente x 100 / pacientes sometidos a tiroidectomía. |
| **Aclaraciones** | Se considera caso de lesión recurrencial transitoria al paciente sometido a tiroidectomía con síntomas compatibles al que se confirma la lesión del nervio laríngeo recurrente mediante laringoscopia y no se resuelve antes de un año tras la intervención. |
| **Tipo de indicador** | Resultado |
| **Justificación** | Las alteraciones de la fonación postoperatorias deberán ser evaluadas por el cirujano. La laringoscopia postoperatoria es recomendable para detectar disfunción postoperatoria de cuerdas vocales que pueda beneficiarse de medidas terapéuticas, y como necesario control de calidad. Resulta indispensable en pacientes con:   - Alteración de motilidad de cuerdas vocales preoperatoria. - Desarrollo postoperatorio de disfonía, fonoastenia, voz bitonal o trastorno deglutorio. - Si se ha efectuado neuromonitorización intraoperatoria, como control de calidad. |
| **Origen del indicador** | Elaboración propia |
| **Referencias bibliográficas** | - Musholt TJ, Clerici T, Dralle H, Frilling A, Goretzki PE, Hermann MM et al. The Interdisciplinary Task Force “Guidelines” of the German Association of Endocrine Surgeons. German Association of Endocrine Surgeons practice guidelines for the surgical treatment of benign thyroid disease. Langenbecks Arch Surg 2011; 396:639-499. - Hodin R, Clark O, Doherty G, Grant C, Heller K, Weige R. Voice issues and laryngoscopy in thyroid surgery patients. Surgery 2013; 154:46-7156. |

|  | **Hipoparatiroidismo transitorio** |
| --- | --- |
| **Fórmula** | Pacientes sometidos a tiroidectomía total o subtotal que presentan hipoparatiroidismo transitorio x 100 / pacientes sometidos a tiroidectomía total o subtotal |
| **Aclaraciones** | Se considera hipoparatiroidismo transitorio cuando el paciente presenta cifras de calcio corregido en sangre inferiores a 8 mg/dl (calcio iónico inferior a 4 mg/dl) tras la tiroidectomía (siendo o no sintomático), y se normalizan antes de un año tras la intervención.  Según la bibliografía, un umbral global deseable debe ser inferior al 30% aunque estas cifras aumentan si se considera de forma aislada la tiroidectomía por cáncer. |
| **Tipo de indicador** | Resultado |
| **Justificación** | La hipocalcemia es la complicación más frecuente tras la tiroidectomía; ocurre de forma transitoria aproximadamente en un 30% de pacientes. Los síntomas de hipocalcemia pueden iniciarse hasta 72 horas tras la tiroidectomía total o subtotal. |
| **Referencias bibliográficas** | - Lo CY. Postthyroidectomy hypocalcemia. J Am Coll Surg 2003; 196:497-8111. - Toniato A, Boschin IM, Piotto A, Pelizzo MR, Guolo A, Foletto M, Casalide E. [Complications in thyroid surgery for carcinoma: one institution's surgical experience.](http://www.ncbi.nlm.nih.gov/pubmed/18204947) World J Surg. 2008; 32:572-5132. - Goltzman, D. Treatment of hypocalcemia. In: UpToDate, Basow, DS (Ed), UpToDate, Waltham, MA, 2013134 |

|  | **Hipoparatiroidismo permanente** |
| --- | --- |
| **Fórmula** | Pacientes sometidos a tiroidectomía total o subtotal que presentan hipoparatiroidismo permanente x 100 / pacientes sometidos a tiroidectomía total o subtotal. |
| **Aclaraciones** | - Se considera hipoparatiroidismo permanente la presencia de cifras de calcio corregido por debajo de 8 mg/dl (calcio iónico < 4 mg/dl) y que se confirma por la determinación de PTH por debajo del límite inferior (< 13 pgr/ml) después del año de la tiroidectomía. - Según la bibliografía, la incidencia de hipoparatiroidismo permanente debe ser inferior al 4%. Si se considera de forma aislada la tiroidectomía por cáncer, estas cifras pueden aumentar. |
| **Tipo de indicador** | Resultado |
| **Justificación** | La hipocalcemia queda como secuela permanente (a partir de un año de la cirugía) hasta en un 4% de pacientes. |
| **Origen del indicador** | Elaboración propia |
| **Referencias bibliográficas** | - Bahn RS, Burch HB, Cooper DS, Garber JR, Greenlee MC, Klein I, et al. Hyperthyroidism and other causes of thyrotoxicosis: management guidelines of the American Thyroid Association and American Association of Clinical Endocrinologists. Endocr Pract. 2011; 17:456-52024. - Youngwirth L, Benavidez J, Sippel R, Chen H. Parathyroid hormone deficiency after total thyroidectomy: incidence and time. J Surg Res 2010; 163:69-71152. |

|  | **Reintervenciones urgentes** |
| --- | --- |
| **Fórmula** | Pacientes sometidos a tiroidectomía que son reintervenidos de forma urgente en las primeras 72 horas del postoperatorio x 100 / pacientes sometidos a tiroidectomía. |
| **Aclaraciones** | Las causas más frecuentes de reintervención urgente en pacientes sometidos a tiroidectomía durante el mismo ingreso son la hemorragia/hematoma cervical, la infección de herida o la necesidad de realización de traqueostomía. |
| **Tipo de indicador** | Resultado |
| **Justificación** | Todas las reintervenciones urgentes derivan de complicaciones graves, que pueden poner en peligro la vida del paciente y su calidad de vida a largo plazo. |
| **Origen del indicador** | Adaptado de “Indicadores de calidad para hospitales del Sistema Nacional de Salud 2012. |
| **Referencias bibliográficas** | - Glick DB. Overview of complications occurring in the post-anesthesia care unit. In: UpToDate, Basow, DS (Ed), UpToDate, Waltham, MA, 2013 101. - Hurtado-López LM, Zaldivar-Ramirez FR, Basurto Kuba E, Pulido Cejudo A, Garza Flores JH, Muńoz Solis O, Campos-Castillo C. [Causes for early reintervention after thyroidectomy.](http://www.ncbi.nlm.nih.gov/pubmed/11951065) Med Sci Monit 2002; 8:CR247-50163. |

|  | **Mortalidad** |
| --- | --- |
| **Fórmula** | Indicador centinela: Se identificará número de casos por año. |
| **Exclusiones** | Ninguna |
| **Aclaraciones** | La presentación de un caso obliga a un análisis de causas. |
| **Tipo de indicador** | Resultado |
| J**ustificación** | - Los indicadores centinelas miden la aparición de sucesos infrecuentes, de manifiesta gravedad, con un marcado componente de evitabilidad, y que requieren una **investigación puntual** de cada caso que aparezca.. - El término centinela refleja la relevancia del accidente, tanto por su gravedad, como por su presunta evitabilidad y por la necesidad de realizar inmediatamente un análisis cuidadoso para valorar cuales han sido los factores condicionantes que han facilitado su aparición y establecer los cambios precisos para que no vuelva a ocurrir. El método de análisis recomendado es el análisis de causas raíz. |
| **Origen del indicador** | Elaboración propia |
| **Referencias bibliográficas** | | - Guide to Inpatient Quality Indicators: Quality of Care in Hospitals- Volume, Mortality, and Utilization. Department of Health and Human Services. Agency for Healthcare Research and Quality, June 2002. Version 3.1 (March 12, 2007), pags 52-53. http://www.qualityindicators.ahrq.gov164 - Joint Commision on Accreditation on Health Care Organizations. (Acceso 2 de octubre de 2013).Disponible en <http://www.jointcommission.org/SentinelEvents/>165 | | --- | | - AHRQ Glossary. (Acceso 2 de octubre de 2013). Disponible en <http://psnet.ahrq.gov/glossary.aspx> 166 | |  | |

|  | **Reingresos urgentes** |
| --- | --- |
| **Fórmula** | Pacientes sometidos a tiroidectomía que reingresan por urgencias en los primeros 30 días tras el alta hospitalaria x 100 / pacientes sometidos a tiroidectomía. |
| **Exclusiones** | Ninguna |
| **Aclaraciones** | Las causas más frecuentes de reingreso son hematoma o infección de herida, tetania y síntomas relacionados con lesión recurrencial (estridor, disfonía, etc.) |
| **Tipo de indicador** | Resultado |
| **Justificación** | Este indicador ofrece la posibilidad de detectar pacientes en los que la gravedad o complejidad de su patología ha evolucionado de manera desfavorable desde su primera visita en urgencias. Permite identificar y estudiar los casos para descartar una valoración diagnóstica y/o estrategia terapéutica inadecuada en su primera visita. |
| **Origen del indicador** | Adaptado de la Sociedad Española de Medicina de Urgencias y Emergencias (SEMES) |
| **Referencias bibliográficas** | - Roqueta Egea F, Busca Ostolaza P, Chanovas Borrás M, López-Andújar Aguiriano L, Mariné Blanco M, Navarro Juanes A, Pavón Monzo JM, Piñera Salmerón P, Tomás Vecina S, Tejedor Fernández M. Manual de Indicadores de calidad para los servicios de urgencias de hospitales. Sociedad Española de Medicina de Urgencias y Emergencias (SEMES). 2009167. - Felisart J, Requena J, Roqueta F, Saura RM, Suñol R, Tomás S Serveis d’Urgencies: indicador per mesurar els criteris de qualitat de l’antenció sanitaria. Barcelona; Agéncia d’Avaluació de Tecnologia i Recerca Médiques. Servei Catalá de la Salut. Departament de Sanitat i Seguretat Social. Generalitat de Catalunya. Junio 2011168. |

|  | **Satisfacción global** |
| --- | --- |
| **Fórmula** | Pacientes sometidos a tiroidectomía que contestan “satisfecho” o “muy satisfecho” en la pregunta “Valoración global durante este ingreso” x 100 / pacientes sometidos a tiroidectomía que cumplimentan esta pregunta. |
| **Exclusiones** | Ninguna |
| **Aclaraciones** | La encuesta de satisfacción mide la calidad percibida del paciente, familia o cuidadores. Se recomienda su utilización y análisis crítico de los resultados para mejorar. |
| **Tipo de indicador** | Resultado |
| **Justificación** | La encuesta de satisfacción es una herramienta útil para valorar el grado de satisfacción del usuario |
| **Origen del indicador** | Elaboración propia |
